# Supplementary material for: The effect of fluorinated aryl substituents on the crystal structures of 1,2,3,5-dithiadiazolyl radicals
Source: Royal Society of Chemistry journal article supplement (doi:10.1039/b911636b), 2009-10-03
Supplement: b911636b.pdf [file b911636b.pdf]

# The effect of fluorinated aryl substituents on the crystal structures of 1,2,3,5-dithiadiazolyl radicals

Caroline S. Clarke<sup>a</sup>, Delia A. Haynes<sup>a¶</sup>, J. Nicholas B. Smith<sup>a</sup>, Andrei Batsanov<sup>b</sup>, Judith A. K. Howard<sup>b</sup>, Sofia I. Pascu<sup>a#</sup> and Jeremy M. Rawson<sup>a</sup>

<sup>a</sup> The Department of Chemistry, The University of Cambridge, Lensfield Road, Cambridge CB2 1EW, UK.

<sup>b</sup> The Department of Chemistry, The University of Durham, South Road, Durham DH1 3LE, UK.

¶ present address Department of Chemistry and Polymer Science, Stellenbosch University, P. Bag X1, Matieland, 7602, Republic of South Africa, [dhaynes@sun.ac.za](mailto:dhaynes@sun.ac.za).

# present address Department of Chemistry, University of Bath, Bath, BA2 7AY, UK

## ELECTRONIC SUPPLEMENTARY INFORMATION

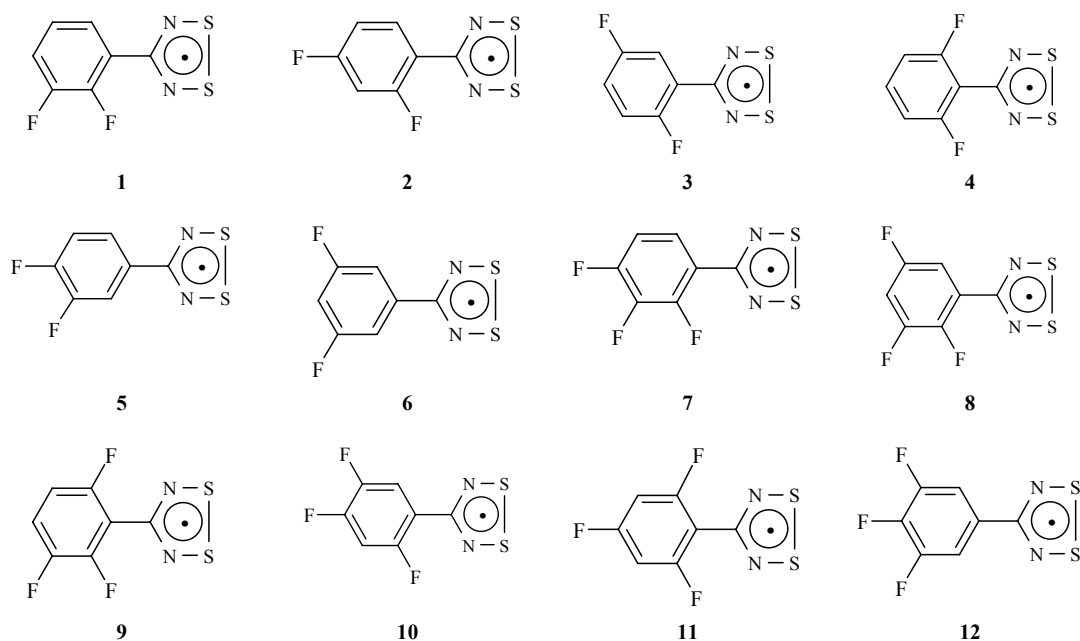

**Scheme S1** The isomers of di- and trifluorophenyl-1,2,3,5-dithiadiazolyl.

### Synthetic details

All the dithiadiazolyls **1** - **12** were synthesized using standard literature methods<sup>1</sup> from commercially available starting materials (Scheme S2).

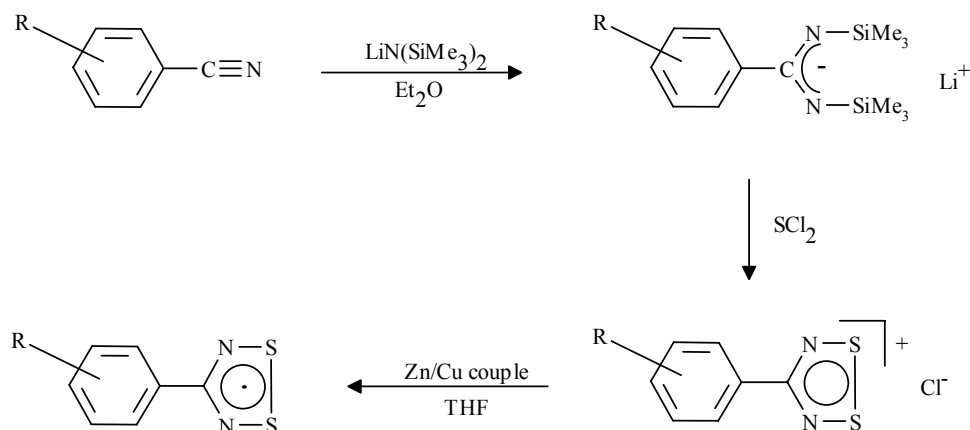

Selected bond lengths and angles are supplied in Table S1.

The synthesis of **1**<sup>2</sup> is described in the experimental section of the paper.

**2**<sup>3</sup>

Sublimation temperature 120 °C, green/black needles

Yield 0.15 g, 7 %

Found: C 37.67, H 1.39, N 13.49 %. Required for C<sub>7</sub>H<sub>3</sub>F<sub>2</sub>N<sub>2</sub>S<sub>2</sub>: C 38.71, H 1.38, N 12.90 %.

+EI-MS: 216.9706 [(C<sub>6</sub>F<sub>2</sub>H<sub>3</sub>)CNSSN]<sup>+</sup>, 171 [(C<sub>6</sub>F<sub>2</sub>H<sub>3</sub>)CNS]<sup>+</sup>, 139 [(C<sub>6</sub>F<sub>2</sub>H<sub>3</sub>)CN]<sup>+</sup>, 112 [C<sub>6</sub>F<sub>2</sub>H<sub>3</sub>]<sup>+</sup>, 78 [S<sub>2</sub>N]<sup>+</sup>.

**3**

Sublimation temperature 90 °C, black/green blocks

Yield 0.54 g, 28 %

Found: C 37.79, H 1.34, N 12.51 %. Required for C<sub>7</sub>H<sub>3</sub>F<sub>2</sub>N<sub>2</sub>S<sub>2</sub>: C 38.71, H 1.38, N 12.90 %.

+EI-MS: 216.9706 [(C<sub>6</sub>F<sub>2</sub>H<sub>3</sub>)CNSSN]<sup>+</sup>, 171 [(C<sub>6</sub>F<sub>2</sub>H<sub>3</sub>)CNS]<sup>+</sup>, 139 [(C<sub>6</sub>F<sub>2</sub>H<sub>3</sub>)CN]<sup>+</sup>, 112 [C<sub>6</sub>F<sub>2</sub>H<sub>3</sub>]<sup>+</sup>, 78 [S<sub>2</sub>N]<sup>+</sup>.

**4α**

Sublimation temperature 110 °C, green/black needles

Yield 0.65 g, 31 %

Found: C 36.87, H 1.38, N 13.19 %. Required for C<sub>7</sub>H<sub>3</sub>F<sub>2</sub>N<sub>2</sub>S<sub>2</sub>: C 38.71, H 1.38, N 12.90 %.

+EI-MS: 216.9706 [(C<sub>6</sub>F<sub>2</sub>H<sub>3</sub>)CNSSN]<sup>+</sup>, 171 [(C<sub>6</sub>F<sub>2</sub>H<sub>3</sub>)CNS]<sup>+</sup>, 139 [(C<sub>6</sub>F<sub>2</sub>H<sub>3</sub>)CN]<sup>+</sup>, 112 [C<sub>6</sub>F<sub>2</sub>H<sub>3</sub>]<sup>+</sup>, 78 [S<sub>2</sub>N]<sup>+</sup>.

**4β**

Sublimation temperature 95 °C under nitrogen (~1/3 atm), black/gold needles

Yield 25 %

Found:

Required for C<sub>7</sub>H<sub>3</sub>F<sub>2</sub>N<sub>2</sub>S<sub>2</sub>: C 38.71, H 1.38, N 12.90 %.

+EI-MS: 216.9706 [(C<sub>6</sub>F<sub>2</sub>H<sub>3</sub>)CNSSN]<sup>+</sup>, 171 [(C<sub>6</sub>F<sub>2</sub>H<sub>3</sub>)CNS]<sup>+</sup>, 139 [(C<sub>6</sub>F<sub>2</sub>H<sub>3</sub>)CN]<sup>+</sup>, 112 [C<sub>6</sub>F<sub>2</sub>H<sub>3</sub>]<sup>+</sup>.

**5**

Sublimation temperature 100 °C, green/black needles

Yield 0.62 g, 28 %

Found: C 37.82, H 1.42, N 13.28 %. Required for C<sub>7</sub>H<sub>3</sub>F<sub>2</sub>N<sub>2</sub>S<sub>2</sub>: C 38.71, H 1.38, N 12.90 %.

+EI-MS: 216.9706 [(C<sub>6</sub>F<sub>2</sub>H<sub>3</sub>)CNSSN]<sup>+</sup>, 171 [(C<sub>6</sub>F<sub>2</sub>H<sub>3</sub>)CNS]<sup>+</sup>, 139 [(C<sub>6</sub>F<sub>2</sub>H<sub>3</sub>)CN]<sup>+</sup>, 112 [C<sub>6</sub>F<sub>2</sub>H<sub>3</sub>]<sup>+</sup>, 78 [S<sub>2</sub>N]<sup>+</sup>.

**6**

Sublimation temperature 120 °C, green/black needles

Yield 0.48 g, 22 %

Found: C 38.21, H 1.45, N 13.23 %. Required for C<sub>7</sub>H<sub>3</sub>F<sub>2</sub>N<sub>2</sub>S<sub>2</sub>: C 38.71, H 1.38, N 12.90 %.

+EI-MS: 216.9706 [(C<sub>6</sub>F<sub>2</sub>H<sub>3</sub>)CNSSN]<sup>+</sup>, 171 [(C<sub>6</sub>F<sub>2</sub>H<sub>3</sub>)CNS]<sup>+</sup>, 139 [(C<sub>6</sub>F<sub>2</sub>H<sub>3</sub>)CN]<sup>+</sup>, 112 [C<sub>6</sub>F<sub>2</sub>H<sub>3</sub>]<sup>+</sup>, 78 [S<sub>2</sub>N]<sup>+</sup>.

**7**<sup>4</sup>

Sublimation temperature 90 °C, dark green polycrystalline bundles

Yield 0.306 g, 21 %

Found: C 35.81, H 0.90, N 12.12 %. Required for C<sub>7</sub>H<sub>2</sub>F<sub>3</sub>N<sub>2</sub>S<sub>2</sub>: C 35.74, H 0.85, N 11.91 %.

+EI-MS: 234.9611 [(C<sub>6</sub>F<sub>3</sub>H<sub>2</sub>)CNSSN]<sup>+</sup>, 189 [(C<sub>6</sub>F<sub>3</sub>H<sub>2</sub>)CNS]<sup>+</sup>, 157 [(C<sub>6</sub>F<sub>3</sub>H<sub>2</sub>)CN]<sup>+</sup>, 78 [S<sub>2</sub>N]<sup>+</sup>.

**9**

Sublimation temperature 105 °C, green/black crystals

Yield 0.175 g, 11 %

Found: C 35.42, H 0.92, N 12.07 %. Required for C<sub>7</sub>H<sub>2</sub>F<sub>3</sub>N<sub>2</sub>S<sub>2</sub>: C 35.74, H 0.85, N 11.91 %.

+EI-MS: 234.9611 [(C<sub>6</sub>F<sub>3</sub>H<sub>2</sub>)CNSSN]<sup>+</sup>, 189 [(C<sub>6</sub>F<sub>3</sub>H<sub>2</sub>)CNS]<sup>+</sup>, 157 [(C<sub>6</sub>F<sub>3</sub>H<sub>2</sub>)CN]<sup>+</sup>, 78 [S<sub>2</sub>N]<sup>+</sup>.

**11**

Sublimation temperature 85 °C, green/black needles

Yield 25 %

Found: C 35.3, H 1.0, N 11.7 %. Required for C<sub>7</sub>H<sub>2</sub>F<sub>3</sub>N<sub>2</sub>S<sub>2</sub>: C 35.74, H 0.85, N 11.91 %.

+EI-MS: 234.9611 [(C<sub>6</sub>F<sub>3</sub>H<sub>2</sub>)CNSSN]<sup>+</sup>, 189 [(C<sub>6</sub>F<sub>3</sub>H<sub>2</sub>)CNS]<sup>+</sup>, 157 [(C<sub>6</sub>F<sub>3</sub>H<sub>2</sub>)CN]<sup>+</sup>, 143 [(C<sub>6</sub>F<sub>3</sub>H<sub>2</sub>)C]<sup>+</sup>.

**12**

Sublimation temperature 120 °C, green/black needles

Yield 0.18 g, 12 %

Found: C 35.34, H 0.88, N 11.71 %. Required for C<sub>7</sub>H<sub>2</sub>F<sub>3</sub>N<sub>2</sub>S<sub>2</sub>: C 35.74, H 0.85, N 11.91 %.

Supplementary Material for CrystEngComm

This journal is (c) The Royal Society of Chemistry 2009

+EI-MS: 234.9611 [(C<sub>6</sub>F<sub>3</sub>H<sub>2</sub>)CNSSN]<sup>+</sup>, 217 [(C<sub>6</sub>F<sub>2</sub>H)CNSSN]<sup>+</sup>, 189 [(C<sub>6</sub>F<sub>3</sub>H<sub>2</sub>)CNS]<sup>+</sup>, 158 [(C<sub>6</sub>F<sub>3</sub>H<sub>2</sub>)CN]<sup>+</sup>, 113 [C<sub>6</sub>F<sub>2</sub>H<sub>2</sub>]<sup>+</sup>, 78 [S<sub>2</sub>N]<sup>+</sup>, 46 [SN]<sup>+</sup>.

**Table S1** Selected bond lengths and angles for a series of fluorinated dithiadiazolyl radicals.

|       | 1°     | 3°       | 4 $\alpha$ | 4 $\beta$  | 5          | 6        | 7°     | 9          | 11         | 12         |
|-------|--------|----------|------------|------------|------------|----------|--------|------------|------------|------------|
| C-N/Å | 1.354  | 1.340(3) | 1.343(10)  | 1.338(2)   | 1.340(6)   | 1.330(8) | 1.346  | 1.3454(16) | 1.333(4)   | 1.3383(19) |
|       | 1.322  | 1.332(3) | 1.318(10)  | 1.332(2)   | 1.332(6)   | 1.343(8) | 1.345  | 1.3396(16) | 1.338(4)   | 1.342(2)   |
|       | 1.362  | 1.333(3) | 1.343(10)  | 1.336(2)   | 1.343(6)   | 1.321(8) | 1.345  | 1.3400(15) | 1.330(4)   | 1.343(2)   |
|       | 1.319  | 1.333(3) | 1.339(10)  | 1.335(2)   | 1.331(6)   | 1.338(8) | 1.345  | 1.3408(15) | 1.339(4)   | 1.335(2)   |
|       |        |          |            |            |            | 1.330(8) |        |            | 1.337(4)   |            |
|       |        |          |            |            |            | 1.341(8) |        |            | 1.343(4)   |            |
|       |        |          |            |            |            | 1.339(8) |        |            | 1.339(4)   |            |
|       |        |          |            |            |            | 1.327(8) |        |            | 1.339(4)   |            |
|       |        |          |            |            |            |          |        |            | 1.340(4)   |            |
|       |        |          |            |            |            |          |        |            | 1.333(4)   |            |
|       |        |          |            |            |            |          |        | 1.337(4)   |            |            |
|       |        |          |            |            |            |          |        | 1.336(4)   |            |            |
| N-S/Å | 1.613  | 1.630(2) | 1.644(6)   | 1.6220(17) | 1.630(4)   | 1.627(5) | 1.630  | 1.6420(11) | 1.640(3)   | 1.6304(14) |
|       | 1.634  | 1.625(2) | 1.637(7)   | 1.6365(16) | 1.629(4)   | 1.626(5) | 1.631  | 1.6324(12) | 1.629(3)   | 1.6379(14) |
|       | 1.636  | 1.627(2) | 1.633(7)   | 1.6280(17) | 1.630(4)   | 1.631(5) | 1.631  | 1.6417(11) | 1.626(3)   | 1.6399(15) |
|       | 1.617  | 1.634(2) | 1.630(7)   | 1.6417(16) | 1.625(4)   | 1.626(5) | 1.631  | 1.6285(11) | 1.625(3)   | 1.6251(14) |
|       |        |          |            |            |            | 1.632(5) |        |            | 1.636(3)   |            |
|       |        |          |            |            |            | 1.621(6) |        |            | 1.624(3)   |            |
|       |        |          |            |            |            | 1.630(5) |        |            | 1.631(3)   |            |
|       |        |          |            |            |            | 1.623(6) |        |            | 1.628(3)   |            |
|       |        |          |            |            |            |          |        |            | 1.616(3)   |            |
|       |        |          |            |            |            |          |        |            | 1.641(3)   |            |
|       |        |          |            |            |            |          |        | 1.629(3)   |            |            |
|       |        |          |            |            |            |          |        | 1.632(3)   |            |            |
| S-S/Å | 2.096  | 2.084(1) | 2.080(3)   | 2.0945(7)  | 2.0915(18) | 2.091(3) | 2.069  | 2.0957(5)  | 2.0911(13) | 2.0972(6)  |
|       | 2.106  | 2.084(1) | 2.081(3)   | 2.0916(7)  | 2.0941(18) | 2.096(3) | 2.069  | 2.0987(5)  | 2.1000(14) | 2.0997(7)  |
|       |        |          |            |            |            | 2.096(3) |        |            | 2.0882(11) |            |
|       |        |          |            |            |            | 2.091(2) |        |            | 2.0876(12) |            |
|       |        |          |            |            |            |          |        |            | 2.0995(12) |            |
|       |        |          |            |            |            |          |        | 2.0868(12) |            |            |
| NCN°  | 121.87 | 121.7(2) | 123.4(7)   | 122.25(17) | 122.5(5)   | 122.6(6) | 121.99 | 122.48(11) | 122.6(3)   | 122.93(14) |
|       | 122.42 | 122.4(2) | 123.2(7)   | 122.47(17) | 122.9(5)   | 123.0(6) | 122.00 | 122.37(11) | 122.4(3)   | 123.12(14) |
|       |        |          |            |            |            | 122.6(6) |        |            | 122.4(3)   |            |
|       |        |          |            |            |            | 122.0(6) |        |            | 122.2(3)   |            |
|       |        |          |            |            |            |          |        |            | 122.7(3)   |            |
|       |        |          |            |            |            |          |        |            | 122.9(3)   |            |

|                  |        |          |           |            |           |           |        |           |           |            |
|------------------|--------|----------|-----------|------------|-----------|-----------|--------|-----------|-----------|------------|
| CNS <sup>o</sup> | 114.28 | 114.3(2) | 113.4(5)  | 114.90(14) | 114.1(3)  | 114.5(5)  | 114.01 | 113.67(9) | 114.1(2)  | 114.12(11) |
|                  | 115.25 | 115.2(2) | 114.0(6)  | 114.20(13) | 114.5(4)  | 114.0(5)  | 113.98 | 114.80(9) | 114.5(2)  | 113.87(11) |
|                  | 115.32 | 114.0(2) | 113.3(6)  | 114.98(14) | 113.8(3)  | 114.3(5)  | 114.02 | 113.89(9) | 114.8(2)  | 113.55(12) |
|                  | 113.66 | 114.7(2) | 113.7(6)  | 113.80(13) | 114.3(3)  | 114.2(5)  | 113.99 | 114.89(9) | 114.4(2)  | 114.34(12) |
|                  |        |          |           |            |           | 114.5(4)  |        |           | 113.8(2)  |            |
|                  |        |          |           |            |           | 114.1(4)  |        |           | 114.6(2)  |            |
|                  |        |          |           |            |           | 114.8(4)  |        |           | 114.2(2)  |            |
|                  |        |          |           |            |           | 114.8(5)  |        |           | 114.5(2)  |            |
|                  |        |          |           |            |           |           |        |           | 115.0(2)  |            |
|                  |        |          |           |            |           |           |        |           | 113.5(2)  |            |
|                  |        |          |           |            |           |           |        |           | 114.1(2)  |            |
|                  |        |          |           |            |           |           |        |           | 113.8(2)  |            |
| NSS <sup>o</sup> | 94.99  | 94.65(9) | 94.4(3)   | 94.19(6)   | 94.47(16) | 94.3(2)   | 94.99  | 94.82(4)  | 94.42(10) | 94.62(5)   |
|                  | 93.60  | 94.14(9) | 94.8(2)   | 94.35(6)   | 94.37(16) | 94.6(2)   | 95.02  | 94.22(4)  | 94.39(10) | 94.39(5)   |
|                  | 95.19  | 94.65(9) | 95.0(3)   | 94.07(6)   | 94.48(16) | 94.3(2)   | 94.99  | 94.58(4)  | 94.05(11) | 94.42(6)   |
|                  | 93.40  | 94.20(9) | 94.8(3)   | 94.67(6)   | 94.51(16) | 94.2(2)   | 95.00  | 94.13(4)  | 94.36(11) | 94.55(6)   |
|                  |        |          |           |            |           | 94.0(2)   |        |           | 94.74(10) |            |
|                  |        |          |           |            |           | 94.7(2)   |        |           | 94.37(10) |            |
|                  |        |          |           |            |           | 93.8(2)   |        |           | 94.61(10) |            |
|                  |        |          |           |            |           | 94.6(2)   |        |           | 94.42(10) |            |
|                  |        |          |           |            |           |           |        |           | 94.01(10) |            |
|                  |        |          |           |            |           |           |        |           | 94.57(10) |            |
|                  |        |          |           |            |           |           |        |           | 94.47(10) |            |
|                  |        |          |           |            |           |           |        |           | 94.71(10) |            |
| Reference        | 2      | 3        | This work | This work  | This work | This work | 4      | This work | This work | This work  |

Theoretical Studies

DFT studies were carried out using the UB3LYP functional and 6-31G\* basis set to probe the orientation dependence of the energy of aryl-substituted dithiadiazolyl radicals. Studies on PhCNSSN have been reported previously<sup>5</sup> but the results are included here for comparison. An initial geometry optimisation was undertaken to determine the optimised geometric parameters for the dithiadiazolyl and aryl rings. This was then followed by a series of single point energy calculations with fixed ring geometries, varying the torsion angle between dithiadiazolyl and aryl rings between 0° and 90° at 10° intervals.

The angular dependence of the energy for PhCNSSN, 2-FC<sub>6</sub>H<sub>4</sub>CNSSN and 2,6-F<sub>2</sub>C<sub>6</sub>H<sub>3</sub>CNSSN are presented below (with E = 0 kJmol<sup>-1</sup> for coplanar rings set as an arbitrary reference).

Angular dependence of the energy of PhCNSSN

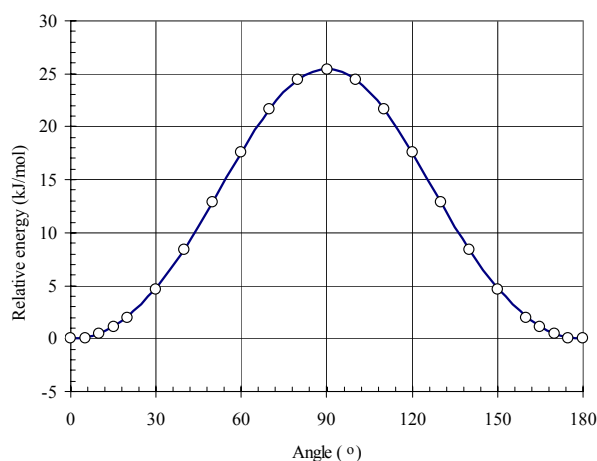

Angular dependence of the energy of 2-FC<sub>6</sub>H<sub>4</sub>CNSSN

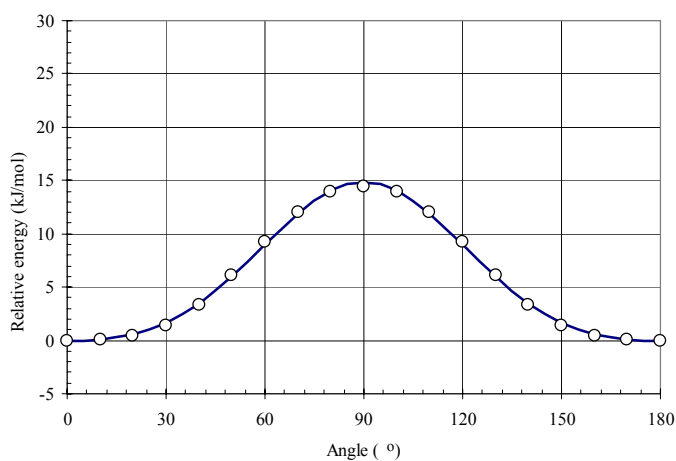

Angular dependence of the energy of 2,6-F<sub>2</sub>C<sub>6</sub>H<sub>3</sub>CNSSN

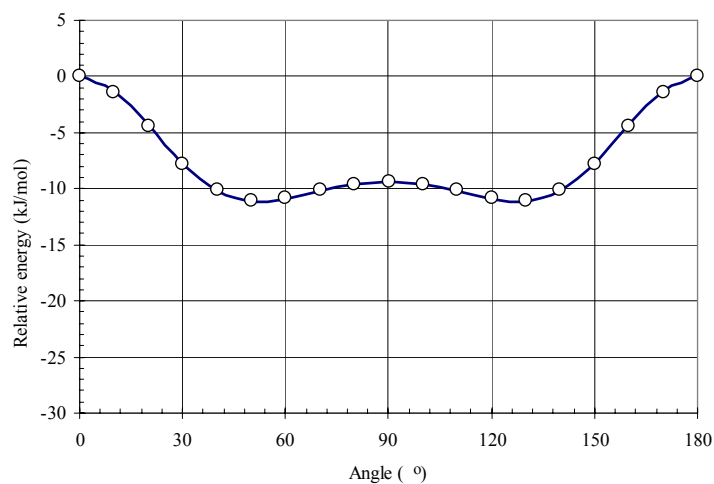

### References

- 1 J.M. Rawson, A.J. Banister and I. Lavender, *Adv. Het. Chem.*, 1995, **62**, 137.
- 2 A.J. Banister, A.S. Batsanov, O.G. Dawe, P.L. Herbertson, J.A.K. Howard, S. Lynn, I. May, J. N. B. Smith, J. M. Rawson, T. E. Rogers, B. K. Tanner, G. Antorrena and F. Palacio, *J. Chem. Soc., Dalton Trans.*, 1997, 2539.
- 3 L. Beer, A. W. Cordes, D. J. T. Myles, R. T. Oakley and N. J. Taylor, *CrystEngComm*, 2000, **2**, 109.
- 4 A.M. Bell, J.N.B. Smith, J.P. Attfield, J.M. Rawson, K. Shankland and W. I. F. David, *New J. Chem.*, 1999, **23**, 565.
- 5 C.S. Clarke, J.M. Rawson and D.W. Bruce, *Magn. Reson. Chem.*, 2009, **47**, 3.
